# Supplementary material for: Bioinspired Rhamnolipid Protects Wheat Against Zymoseptoria tritici Through Mainly Direct Antifungal Activity and Without Major Impact on Leaf Physiology
Source: Frontiers journal article supplement (doi:10.3389/fpls.2022.878272), 2022-06-03
Supplement: Data_Sheet_1.PDF [file Data_Sheet_1.PDF]

## SUPPLEMENTARY FIGURES

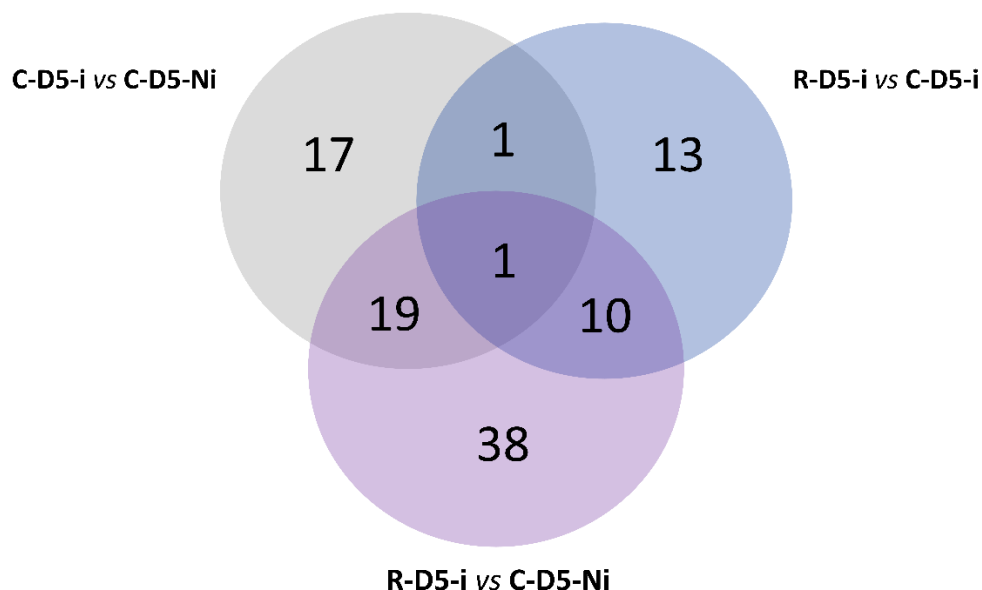

**SUPPLEMENTARY FIGURE 1** | Venn diagram of the number of differentially expressed genes observed during the fungus effect (C-D5-i vs C-D5-Ni), the priming effect (R-D5-i vs C-D5-i) and the whole deregulation on gene expression caused by the rhamnolipid treatment followed by *Z. tritici* infection (R-D5-i vs C-D5-Ni) at five days after treatment. Wheat cultivar Alixan, *Z. tritici* T02596 strain and a rhamnolipid concentration of 500 mg.L<sup>-1</sup> were used. Abbreviations : C stands for a mock treatment while R is for Rh-Est-C12 application ; Ni relates to a mock inoculated wheat while i means inoculated plants with *Z. tritici* ; D5 indicates the sampling date of the third-leaves, corresponding to five days after treatment.

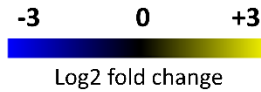

| A             |  | B |  |                                                                         |
|---------------|--|---|--|-------------------------------------------------------------------------|
| TA54418_4565  |  |   |  | <b>Response to abiotic stress</b>                                       |
| U73211        |  |   |  |                                                                         |
| CA624093      |  |   |  |                                                                         |
| AF058794      |  |   |  |                                                                         |
| TA73273_4565  |  |   |  |                                                                         |
| TA84187_4565  |  |   |  |                                                                         |
| TA92949_4565  |  |   |  |                                                                         |
| TA62230_4565  |  |   |  |                                                                         |
| CF133748      |  |   |  |                                                                         |
| DQ286566      |  |   |  |                                                                         |
| TC421665      |  |   |  |                                                                         |
| AY781354      |  |   |  |                                                                         |
| EF028787      |  |   |  |                                                                         |
| EF028785      |  |   |  |                                                                         |
| TC369712      |  |   |  |                                                                         |
| TA59927_4565  |  |   |  | <b>Response to oxidative stress</b>                                     |
| TA59060_4565  |  |   |  |                                                                         |
| TA102260_4565 |  |   |  |                                                                         |
| TC401354      |  |   |  |                                                                         |
| BQ161851      |  |   |  |                                                                         |
| CK212695      |  |   |  |                                                                         |
| TA61435_4565  |  |   |  |                                                                         |
| TC384087      |  |   |  |                                                                         |
| TA61129_4565  |  |   |  |                                                                         |
| CA600821      |  |   |  |                                                                         |
| TC429241      |  |   |  | <b>Response to pathogens</b>                                            |
| TA51226_4565  |  |   |  |                                                                         |
| TC426538      |  |   |  |                                                                         |
| TA72415_4565  |  |   |  |                                                                         |
| TC442947      |  |   |  |                                                                         |
| EF570122      |  |   |  |                                                                         |
| TA76681_4565  |  |   |  |                                                                         |
| TA57993_4565  |  |   |  | <b>Flowering and seed maturation</b>                                    |
| TA84120_4565  |  |   |  |                                                                         |
| TC404192      |  |   |  |                                                                         |
| TA70093_4565  |  |   |  |                                                                         |
| TA86268_4565  |  |   |  | <b>Growth and development</b>                                           |
| TA70788_4565  |  |   |  |                                                                         |
| TA61980_4565  |  |   |  |                                                                         |
| DQ435671      |  |   |  |                                                                         |
| TC405303      |  |   |  |                                                                         |
| L27516        |  |   |  |                                                                         |
| TA61828_4565  |  |   |  | <b>Cell wall structure and function</b>                                 |
| TA66611_4565  |  |   |  |                                                                         |
| CK152333      |  |   |  |                                                                         |
| TA87087_4565  |  |   |  |                                                                         |
| CK207368      |  |   |  |                                                                         |
| TA77295_4565  |  |   |  |                                                                         |
| TA77906_4565  |  |   |  |                                                                         |
| TA60114_4565  |  |   |  |                                                                         |
| TA61116_4565  |  |   |  |                                                                         |
| TA92734_4565  |  |   |  | <b>Chloroplast structure, light harvesting, carbohydrate metabolism</b> |
| TC371150      |  |   |  |                                                                         |
| CK217674      |  |   |  |                                                                         |
| TA55816_4565  |  |   |  |                                                                         |
| TA61423_4565  |  |   |  |                                                                         |
| TA59583_4565  |  |   |  |                                                                         |
| EU492898      |  |   |  |                                                                         |
| TA70102_4565  |  |   |  |                                                                         |
| TA91251_4565  |  |   |  |                                                                         |
| TA52838_4565  |  |   |  | <b>Amino acid metabolism</b>                                            |
| TC393988      |  |   |  |                                                                         |
| TA69140_4565  |  |   |  |                                                                         |
| TA69994_4565  |  |   |  |                                                                         |
| TA82049_4565  |  |   |  | <b>Protein metabolism</b>                                               |
| TA67255_4565  |  |   |  |                                                                         |
| HM209063      |  |   |  |                                                                         |
| TC391450      |  |   |  |                                                                         |
| JX104551      |  |   |  | <b>Lipid metabolism</b>                                                 |
| TA53535_4565  |  |   |  |                                                                         |
| TA58123_4565  |  |   |  |                                                                         |
| TA87662_4565  |  |   |  | <b>Signaling, transcription, translation, etc.</b>                      |
| TA52495_4565  |  |   |  |                                                                         |
| TA81385_4565  |  |   |  |                                                                         |
| TA68843_4565  |  |   |  |                                                                         |
| TA54635_4565  |  |   |  |                                                                         |
| TA73684_4565  |  |   |  |                                                                         |
| D16416        |  |   |  |                                                                         |
| AY881102      |  |   |  |                                                                         |
| TA74203_4565  |  |   |  |                                                                         |
| TA85618_4565  |  |   |  |                                                                         |
| CA721206      |  |   |  |                                                                         |
| EF040602      |  |   |  |                                                                         |
| TA51878_4565  |  |   |  |                                                                         |
| TC389894      |  |   |  |                                                                         |

**SUPPLEMENTARY FIGURE 2 |** Heatmap representation of differentially expressed genes (DEGs) in (A) wheat leaves treated with Rh-Est-C12 and infected with *Z. tritici* compared to non-infected and treated leaves (R-D5-i vs R-D5-Ni), and (B) the whole response specter of DEGs in wheat leaves treated with Rh-Est-C12 and infected with *Z. tritici* compared to the non-treated and non-infected control plants (R-D5-i vs C-D5-Ni), at five days after treatment. Wheat cultivar Alixan, *Z. tritici* T02596 strain and a rhamnolipid concentration of 500 mg.L<sup>-1</sup> were used. Gene-related physiological processes are represented on the right part of the heatmap and were determined using NCBI, AmiGO 2 Gene Ontology, KEGG and UniProt. Significant relative change in gene transcription is expressed in Log2 ratio, according to the yellow-blue color scale, using the WebMev software. Abbreviations : C stands for a mock treatment while R is for Rh-Est-C12 application ; Ni relates to a mock inoculated wheat while i means inoculated plants with *Z. tritici* ; D5 indicates the sampling date of the third-leaves, corresponding to five days after treatment.

### A) R-D-i vs R-D-Ni

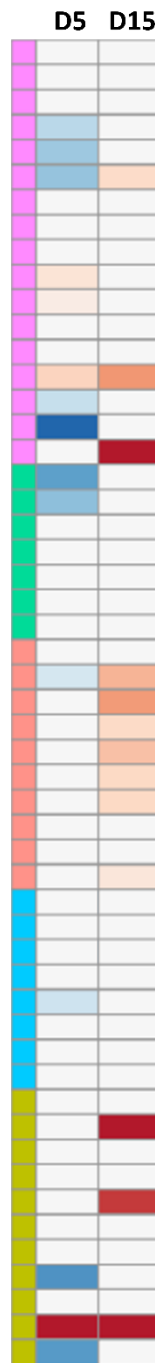

### B) R-D-i vs C-D-Ni

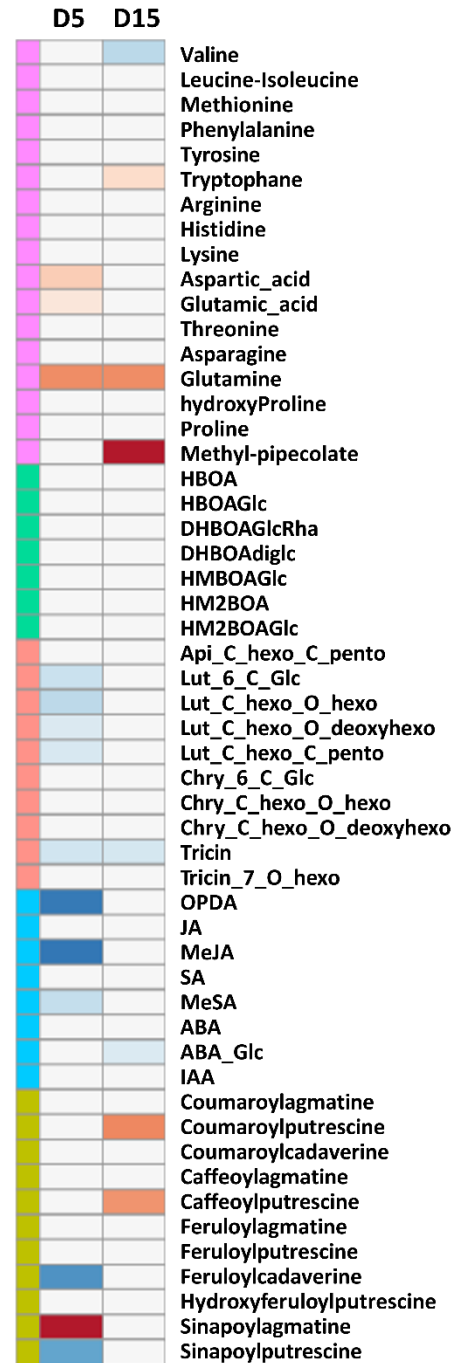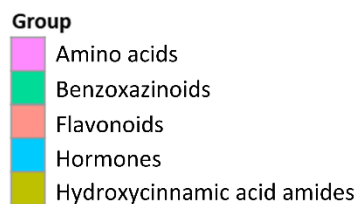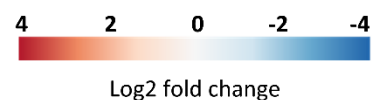

**SUPPLEMENTARY FIGURE 3 |** Heatmap representation of differentially expressed genes (DEGs) in (A) wheat leaves treated with Rh-Est-C12 and infected with *Z. tritici* compared to non-infected and treated leaves (R-D5-i vs R-D5-Ni), and (B) the whole response specter of DEGs in wheat leaves treated with Rh-Est-C12 and infected with *Z. tritici* compared to the non-treated and non-infected control plants (R-D5-i vs C-D5-Ni), at five days after treatment. Wheat cultivar Alixan, *Z. tritici* T02596 strain and a rhamnolipid concentration of 500 mg.L<sup>-1</sup> were used. Gene-related physiological processes are represented on the right part of the heatmap and were determined using NCBI, AmiGO 2 Gene Ontology, KEGG and UniProt. Significant relative change in gene transcription is expressed in Log2 ratio, according to the yellow-blue color scale, using the WebMev software. Abbreviations : C stands for a mock treatment while R is for Rh-Est-C12 application ; Ni relates to a mock inoculated wheat while i means inoculated plants with *Z. tritici* ; D5 indicates the sampling date of the third-leaves, corresponding to five days after treatment.
