# Supplementary material for: Bioinspired Rhamnolipid Protects Wheat Against Zymoseptoria tritici Through Mainly Direct Antifungal Activity and Without Major Impact on Leaf Physiology
Source: Front Plant Sci. 2022 Jun 3;13:878272. doi: 10.3389/fpls.2022.878272 (PMC9204090; doi:10.3389/fpls.2022.878272)
Supplement: Supplementary file 2 [file Table_1.XLSX]

## Sheet: Feuil1
SUPPLEMENTARY TABLE 1 | Original data used for the production of the Supplementary Figure S2, illustrating the alterations in gene expression pattern responses in (A) wheat leaves treated with Rh-Est-C12 and infected with Z. tritici compared to non-infected and treated leaves (R-D5-i vs R-D5-Ni), and (B) the whole response specter of DEGs in wheat leaves treated with Rh-Est-C12 and infected with …
	A	B
Name	R-D5-i vs R-D5-Ni	R-D5-i vs C-D5-Ni	Description	TopHit	ID	RefNumber
Response to abiotic stress
TA54418_4565	7.47849	1	Cold acclimation protein WCOR413	ta|TA54418_4565|tc|TC369682|tc|TC431932	A_99_P210931	43524
U73211	2.6271	1	Cold acclimation protein WCOR410c (Wcor410c)	gb|U73211|gb|U73210|gb|JV907368|ta|TA64689_4565	A_99_P509672	30914
CA624093	3.12371	6.32014	Low temperature induced protein	ta|CA624093|ta|CK217285|tc|TC410528	A_99_P459967	11840
AF058794	3.22165	2.80689	COR39 (cor39)	gb|AF058794|gb|DR739608|gb|L27516|gb|M93342	A_99_P000281	39752
TA73273_4565	4.64515	4.6272	ATP-dependent RNA helicase	ta|TA73273_4565|tc|TC388850|tc|TC394717	A_99_P430447	24209
TA84187_4565	0.333965	1	Protein phosphatase type 2-C	ta|TA84187_4565|ta|BJ314772|ta|CK207520|tc|TC406338	A_99_P308421	21815
TA92949_4565	0.264686	1	Efflux transporter, RND family, MFP subunit	ta|TA92949_4565|tc|TC418808	A_99_P144213	15689
TA62230_4565	0.347019	1	NAC transcription factor	ta|TA62230_4565|ta|CK215014|ta|CK151660|tc|TC391577	A_99_P232346	6986
CF133748	0.505439	1	Myb-related protein	ta|CF133748|tc|TC378272	A_99_P453952	5264
DQ286566	0.343877	0.415701	WRKY transcription factor (WRKY)	gb|DQ286566|ta|TA88485_4565|ta|CF133596|ta|CA597926	A_99_P455767	42312
TC421665	0.46669	0.544856	Transcription factor Myb2	tc|TC421665|tc|TC384792	A_99_P479147	37654
AY781354	0.465764	0.43302	DREB transcription factor 4A (DREB4)	gb|AY781354|gb|AY781358|ta|TA49850_4565|ta|TA49849_4565	A_99_P197071	14918
EF028787	0.333075	0.270577	CBFIVd-D22	gb|EF028787|ta|TA111739_4565|tc|TC416713	A_99_P405352	948
EF028785	0.348764	0.262856	CBFIVd-A22	gb|EF028785|gb|EF028787|gb|AK334356|tc|TC416713	A_99_P140518	15660
TC369712	0.269316	0.259688	Salt stress root protein RS1	tc|TC369712	A_99_P407642	6772
TC436852	1	0.373428	Hly-III related proteins	tc|TC436852	A_99_P511722	6696
TA59927_4565	1	0.443532	Monodehydroascorbate reductase	ta|TA59927_4565|ta|BQ619813|tc|TC404007	A_99_P224741	7355
TA59060_4565	1	0.394519	22 kDa drought-inducible protein	ta|TA59060_4565|tc|TC372962	A_99_P222071	24327
Response to oxidative stress
TA102260_4565	7.77248	7.22802	Nitrite reductase apoprotein	ta|TA102260_4565|tc|TC448413	A_99_P366657	8326
TC401354	0.447227	1	Metallothionein-like protein type 3	tc|TC401354	A_99_P446677	44649
BQ161851	0.476041	0.419958	Peroxidase	ta|BQ161851|tc|TC390065	A_99_P431937	25512
CK212695	0.417447	0.318383	Class III peroxidase 62 precursor	ta|CK212695|tc|TC370038	A_99_P407997	44165
TA61435_4565	0.174094	0.202707	Peroxidase 6	ta|TA61435_4565|tc|TC407750|tc|TC450152|tc|TC409158	A_99_P415477	32597
TC384087	0.473866	0.427491	Glutathione S-transferase	tc|TC384087	A_99_P411017	6865
TA61129_4565	0.406199	0.409203	Glutathione transferase	ta|TA61129_4565|ta|TA61150_4565|tc|TC397554	A_99_P228341	15064
CA600821	0.441424	0.340844	Metallothioneine type2	ta|CA600821|tc|TC410629	A_99_P460107	16140
TC429241	1	0.446305	Peptide methionine sulfoxide reductase	tc|TC429241	A_99_P494392	29872
TA51226_4565	1	0.419575	Glutaredoxin	ta|TA51226_4565|tc|TC403815	A_99_P200897	45008
Response to pathogens
TC426538	3.26899	6.68608	Chitinase 2	tc|TC426538	A_99_P488752	20923
TA72415_4565	1	3.10795	Chitinase	ta|TA72415_4565|ta|CK212185|tc|TC372159	A_99_P268406	11345
TC442947	0.305409	0.305409	ENOD40-like protein	tc|TC442947	A_99_P525387	1183
EF570122	0.319141	0.395045	Pathogen-inducible transcription factor ERF3	gb|EF570122|gb|HP624359|ta|TA92949_4565|ta|TA90257_4565	A_99_P177974	11088
TA76681_4565	0.303802	1	HS1-like protein	ta|TA76681_4565|ta|TA76683_4565|tc|TC444375|tc|TC399271	A_99_P194333	16022
TA57993_4565	0.368538	1	MutT/nudix-like	ta|TA57993_4565|tc|TC431895	A_99_P219466	4113
Flowering and seed maturation
TA84120_4565	0.3312	0.326933	Protein EGG APPARATUS-1	ta|TA84120_4565|tc|TC437285	A_99_P308216	36050
TC404192	1	0.413688	AAA ATPase, central region (50.1 kD)-like protein	tc|TC404192	A_99_P450607	15744
TA70093_4565	1	0.447563	U2AF small subunit	ta|TA70093_4565|ta|TA70096_4565|tc|TC393452|tc|TC378236	A_99_P260356	14065
TA86268_4565	1	6.35526	CONSTANS interacting protein 5	ta|TA86268_4565|tc|TC383052	A_99_P315626	21018
Growth and development
TA70788_4565	0.387253	0.417269	Dormancy/auxin associated protein	ta|TA70788_4565|tc|TC377977	A_99_P262826	45151
TA61980_4565	1	0.384944	Abscisic stress ripening-like protein	ta|TA61980_4565|ta|CJ671675|tc|TC399195	A_99_P231656	43647
DQ435671	1	0.375206	Alpha tubulin-1D (TUBA-1D)	gb|DQ435671|ta|TA55174_4565|ta|TA55154_4565|ta|TA55045_4565	A_99_P012999	6685
TC405303	0.314216	1	Mitogen-activated protein kinase 7	tc|TC405303	A_99_P452302	22398
L27516	3.3956	1	Wcs66	gb|L27516|gb|M93342|ta|TA60511_4565|ta|TA60507_4565	A_99_P167734	4367
Cell wall structure and activity
TA61828_4565	1	0.399932	Non-specific lipid-transfer protein	ta|TA61828_4565|tc|TC390968|tc|TC385911	A_99_P231006	27677
TA66611_4565	1	0.249225	Fasciclin-like protein FLA15	ta|TA66611_4565|ta|CA732456|tc|TC410644|tc|TC446041	A_99_P248201	22500
CK152333	1	0.285468	Type 1 non specific lipid transfer protein precursor	ta|CK152333|tc|TC400994	A_99_P446157	36915
TA87087_4565	1	0.0944321	Cinnamyl alcohol dehydrogenase	ta|TA87087_4565|tc|TC406587	A_99_P318481	8569
CK207368	1	0.523184	Cellulose synthase BoCesA7	ta|CK207368|tc|TC384186|tc|TC379781	A_99_P424332	22342
TA77295_4565	1	0.468771	3-ketoacyl-CoA synthase	ta|TA77295_4565|ta|CJ656162|tc|TC421891	A_99_P284791	23697
TA77906_4565	0.452698	0.422312	Hydroxyproline-rich glycoprotein-like	ta|TA77906_4565|tc|TC415481|tc|TC400999	A_99_P286926	32415
TA60114_4565	0.4	0.404463	UDP-D-xylose epimerase 2	ta|TA60114_4565|ta|CK205445|ta|CA653002|tc|TC433088	A_99_P412027	14821
TA61116_4565	0.493272	0.308198	Non-specific lipid-transfer protein 4.3 precursor	ta|TA61116_4565|tc|TC372976	A_99_P228291	22943
Chloroplast structure and function
TA92734_4565	1	0.175179	Diap1 protein	ta|TA92734_4565|tc|TC422388	A_99_P337136	42984
Light harvesting and photosynthesis
TC371150	0.237073	0.285775	Chlorophyll a/b-binding protein WCAB precursor	tc|TC371150	A_99_P409112	19146
CK217674	0.334694	0.374857	Chloroplast pigment-binding protein CP24	ta|CK217674|tc|TC394184	A_99_P437157	39278
TA55816_4565	1	0.475888	Light-harvesting complex I	ta|TA55816_4565|ta|CJ731763|tc|TC435331	A_99_P214401	27084
TA61423_4565	1	0.453304	Chloroplast pigment-binding protein CP24	ta|TA61423_4565|ta|TA61428_4565|ta|TA61430_4565|tc|TC418054	A_99_P229541	44166
TA59583_4565	0.428818	1	Light-regulated protein precursor	ta|TA59583_4565|tc|TC414713	A_99_P223636	16866
EU492898	0.484527	1	Ribulose-1,5-bisphosphate carboxylase	gb|EU492898|ta|TA55142_4565|ta|TA54100_4565|ta|TA55134_4565	A_99_P625436	18029
Carbohydrate metabolism
TA70102_4565	0.249294	0.310529	Phosphoenolpyruvate carboxykinase	ta|TA70102_4565|ta|TA70105_4565|tc|TC418463	A_99_P260386	18755
TA91251_4565	0.291112	0.334072	Isoform ERG1b of A2WWV5	ta|TA91251_4565|tc|TC384600	A_99_P332361	17064
Amino-acids metabolism
TA52838_4565	4.00932	4.58667	Glycine rich protein	ta|TA52838_4565|ta|TA53180_4565|tc|TC422470|tc|TC414979	A_99_P163692	5193
TC393988	0.267692	0.21825	Glycine/proline-rich protein	tc|TC393988	A_99_P543657	7174
TA69140_4565	0.262423	0.223384	L-allo-threonine aldolase-related protein	ta|TA69140_4565|ta|TA69141_4565|tc|TC403445|tc|TC382170	A_99_P449637	41850
TA69994_4565	0.242194	0.262122	Glutamate dehydrogenase	ta|TA69994_4565|ta|CJ567636|tc|TC387564	A_99_P259951	10977
TA82049_4565	1	2.79758	Bifunctional aspartokinase/homoserine dehydrogenase 2, chloroplast precursor	ta|TA82049_4565|ta|TA82051_4565|tc|TC388532|tc|TC398166	A_99_P163227	42192
Protein metabolism
TA67255_4565	3.34951	3.50739	Heat-shock protein precursor	ta|TA67255_4565|ta|CK156739|tc|TC429655	A_99_P250376	10187
HM209063	0.569765	0.517731	Heat shock protein 70-like (HSP70)	gb|HM209063|gb|HP619938|gb|L41505|ta|TA62928_4565	A_99_P234541	16785
TC391450	0.245825	1	ATP-dependent Clp protease ATP-binding subunit	tc|TC391450	A_99_P433687	20222
JX104551	0.394155	1	SNAP34	gb|JX104551|ta|TA79525_4565|ta|TA79522_4565|tc|TC375443	A_99_P292561	27821
TA53535_4565	1	0.397298	Ubiquitin carrier protein	ta|TA53535_4565|ta|TA53345_4565|ta|CD884325|tc|TC377198	A_99_P208256	24763
Lipid metabolism
TA58123_4565	0.451025	1	Fatty acid desaturase	ta|TA58123_4565|ta|TA58153_4565|tc|TC410613|tc|TC408355	A_99_P219611	11349
TA87662_4565	1	0.447858	Acyl-ACP thioesterase	ta|TA87662_4565|ta|BQ620068|tc|TC394414	A_99_P437477	32120
TA52495_4565	1	0.452733	Lysophospholipase-like protein	ta|TA52495_4565|ta|CJ601597|ta|DR739661|tc|TC460385	A_99_P204796	24058
Signaling, transcription, translation
TA81385_4565	5.0694	4.32356	Phosphoenolpyruvate carboxylase	ta|TA81385_4565|ta|TA81386_4565|ta|CK194510|tc|TC442122	A_99_P299011	44004
TA68843_4565	0.46743	0.390759	Exonuclease family protein	ta|TA68843_4565|tc|TC382982	A_99_P256071	41928
TA54635_4565	0.232213	0.379407	EF-hand Ca2+-binding protein CCD1	ta|TA54635_4565|ta|CK217390|ta|CA691513|tc|TC391273	A_99_P165947	28159
TA73684_4565	0.324307	0.377086	Serine/threonine protein kinase	ta|TA73684_4565|ta|TA73683_4565|tc|TC383903|tc|TC432301	A_99_P423972	31763
D16416	0.233447	0.261132	Zinc-finger protein WZF1	gb|D16416|ta|TA77580_4565|tc|TC426981|tc|TC371841	A_99_P489622	10858
AY881102	0.434762	1	Putative MAPK protein kinase (MAPK1a)	gb|AY881102|ta|TA68379_4565|ta|TA68381_4565|ta|CD907464	A_99_P014394	16503
TA74203_4565	0.394928	1	Receptor-like protein kinase	ta|TA74203_4565|ta|BG905193|tc|TC456633	A_99_P274251	4201
TA85618_4565	1	3.99788	DEAD-box ATP-dependent RNA helicase 26	ta|TA85618_4565|ta|TA85617_4565|tc|TC414240	A_99_P313296	14881
CA721206	1	0.444488	Zinc finger protein 219	ta|CA721206|tc|TC446120	A_99_P533942	44850
EF040602	1	0.456289	ZIM motif-containing protein	gb|EF040602|ta|TA54602_4565|ta|TA54480_4565|ta|TA54551_4565	A_99_P614787	18006
TA51878_4565	1	0.427824	Susceptibility homeodomain transciption factor	ta|TA51878_4565|ta|CA606326|ta|CA642983|tc|TC390886	A_99_P202881	23811
Other functions
TC389894	3.94494	4.02638	Tetratricopeptide repeat (TPR)-containing protein-like	tc|TC389894	A_99_P431697	38421
