# Supplementary material for: Bioinspired Rhamnolipid Protects Wheat Against Zymoseptoria tritici Through Mainly Direct Antifungal Activity and Without Major Impact on Leaf Physiology
Source: Front Plant Sci. 2022 Jun 3;13:878272. doi: 10.3389/fpls.2022.878272 (PMC9204090; doi:10.3389/fpls.2022.878272)
Supplement: Supplementary file 3 [file Table_2.XLSX]

## Sheet: Feuil1
SUPPLEMENTARY TABLE 2 |Original data used for the production of the Figure 4, illustrating the alterations in gene expression pattern responses in wheat leaves caused by the eliciting effect of Rh-Est-C12 at two (A) and five (B) days after treatment (R-D2-Ni vs C-D2-Ni and R-D5-Ni vs C-D5-Ni, respectively), (C) the Z. tritici infection alone at five days treatement (C-D5-i vs C-D5-Ni), and (D) th…
	Eliciting effect		Fungal effect	Priming effect
	A	B	C	D
Name	R-D2-Ni vs C-D2-Ni	R-D5-Ni vs C-D5-Ni	C-D5-i vs C-D5-Ni	R-D5-i vs C-D5-i	Description	TopHit	ID	RefNumber
Response to abiotic stress
TC381840	2.47601	1	3.06048	1	Cold acclimation protein WCOR518	tc|TC381840	A_99_P421457	19082
TA54418_4565	1	1	2.52972	1	Cold acclimation protein WCOR413	ta|TA54418_4565|tc|TC369682|tc|TC431932	A_99_P210931	43524
CA624093	1	1	8.88242	1	Low temperature induced protein	ta|CA624093|ta|CK217285|tc|TC410528	A_99_P459967	11840
EF028787	1	1	0.30432	1	CBFIVd-D22	gb|EF028787|ta|TA111739_4565|tc|TC416713	A_99_P405352	948
EF028785	1	1	0.254309	1	CBFIVd-A22	gb|EF028785|gb|EF028787|gb|AK334356|tc|TC416713	A_99_P140518	15660
EF028775	1	1	0.253465	1	CBFIVb-21.1	gb|EF028775|tc|TC374270	A_99_P012439	20101
AY428036	1	1	0.376769	1	Dehydration response element binding protein	gb|AY428036|gb|EF028780|ta|TA101025_4565|ta|DQ286550	A_99_P074325	23922
TC436852	1	1	0.295474	1	Hly-III related protein	tc|TC436852	A_99_P511722	6696
TA78527_4565	1	1	0.459362	1	BZIP transcription factor bZIP110	ta|TA78527_4565|tc|TC377904|tc|TC428632	A_99_P289066	42528
TC369712	1	1	1	0.475517	Salt stress root protein RS1	tc|TC369712	A_99_P407642	6772
TA62779_4565	1	1	1	3.4587	Aquaporin PIP1	ta|TA62779_4565|ta|CJ695980|ta|CK205772|tc|TC376028	A_99_P234106	9903
TA73273_4565	1	1	1	2.86428	ATP-dependent RNA helicase	ta|TA73273_4565|tc|TC388850|tc|TC394717	A_99_P430447	24209
Response to oxidative stress
TA61073_4565	1	1	0.334447	1	Zinc-containing alcohol dehydrogenase superfamily	ta|TA61073_4565|ta|CD905968|ta|CK205859|tc|TC413085	A_99_P408522	21811
CA600821	1	1	0.276011	1	Metallothioneine type2	ta|CA600821|tc|TC410629	A_99_P460107	16140
TA84010_4565	2.94562	1	1	0.379603	Nodulin-like protein	ta|TA84010_4565|tc|TC380953|tc|TC385269	A_99_P307876	15025
TA61435_4565	0.334783	1	1	0.148665	Peroxidase 6	ta|TA61435_4565|tc|TC407750|tc|TC450152|tc|TC409158	A_99_P415477	32597
BQ161851	1	1	1	0.284953	Peroxidase	ta|BQ161851|tc|TC390065	A_99_P431937	25512
CK212695	1	1	1	0.317992	Class III peroxidase 62 precursor	ta|CK212695|tc|TC370038	A_99_P407997	44165
TA66389_4565	1	1	1	0.29225	Peroxidase precursor	ta|TA66389_4565|ta|TA66384_4565|ta|BJ281736|tc|TC409014	A_99_P247391	14997
AF532972	1	1	1	0.480155	chromosome 6BL thylakoid-bound ascorbate peroxidase	gb|AF532972|gb|AK331910|ta|TA69944_4565|ta|TA69941_4565	A_99_P259786	38976
Response to pathogens
TA54666_4565	1	0.292432	1	1	Class I chitinase	ta|TA54666_4565|ta|TA54555_4565|ta|CA669947|tc|TC380557	A_99_P211671	41435
TC426538	1	1	13.5307	1	Chitinase 2	tc|TC426538	A_99_P488752	20923
TA72415_4565	1	1	4.85973	1	Chitinase	ta|TA72415_4565|ta|CK212185|tc|TC372159	A_99_P268406	11345
TA55707_4565	1	1	3.44245	1	Thaumatin-like protein TLP4	ta|TA55707_4565|ta|CA670411|ta|CV774285|tc|TC413450	A_99_P509202	23176
TC392855	1	1	0.550667	1	Protein WIR1A	tc|TC392855	A_99_P060636	28568
TA70475_4565	1	1	0.4104	1	RGA2	ta|TA70475_4565|tc|TC390879|tc|TC400364	A_99_P433007	20640
TA65444_4565	1	1	0.390665	1	Reticulon	ta|TA65444_4565|ta|TA65446_4565|ta|CK162726|tc|TC374779	A_99_P412857	7188
TA53249_4565	1	1	0.255561	1	IPS1 riboregulator	ta|TA53249_4565|ta|CJ668336|tc|TC404244	A_99_P207336	20707
TC442947	1	1	0.328141	1	ENOD40-like protein	tc|TC442947	A_99_P525387	1183
TA76681_4565	1	1	1	0.266598	HS1-like protein	ta|TA76681_4565|ta|TA76683_4565|tc|TC444375|tc|TC399271	A_99_P194333	16022
Secondary metabolism
TA50072_4565	1	1	1	3.68393	Probable pyridoxal biosynthesis protein PDX1.1	ta|TA50072_4565|ta|BJ256106|tc|TC413627	A_99_P197801	18956
Flowering and seed maturation
TA84120_4565	1	1	0.275139	1	Protein EGG APPARATUS-1	ta|TA84120_4565|tc|TC437285	A_99_P308216	36050
Growth and development
DQ435671	4.02238	1	1	1	alpha tubulin-1D (TUBA-1D)	gb|DQ435671|ta|TA55174_4565|ta|TA55154_4565|ta|TA55045_4565	A_99_P012999	6685
TA86474_4565	4.61367	1	1	1	Auxin Efflux Carrier	ta|TA86474_4565|ta|CJ670181|tc|TC459276	A_99_P192117	12326
TA56474_4565	0.350723	1	1	1	Auxin-repressed protein	ta|TA56474_4565|tc|TC376223	A_99_P215841	35480
TA56454_4565	0.289557	1	1	1	Auxin-repressed protein	ta|TA56454_4565|tc|TC403503|tc|TC407200	A_99_P215761	27870
TA67195_4565	0.344503	1	1	1	Protein cab-1	ta|TA67195_4565|tc|TC458457	A_99_P250166	16476
TA72187_4565	1	1	0.287621	1	Cell Division Protein AAA ATPase family	ta|TA72187_4565|ta|CA745754|tc|TC440364	A_99_P267636	41732
TA61883_4565	1	1	1	3.54858	Sterol desaturase family protein	ta|TA61883_4565|ta|TA61889_4565|tc|TC402265	A_99_P231241	32885
TA70788_4565	1	1	1	0.281343	Dormancy/auxin associated protein	ta|TA70788_4565|tc|TC377977	A_99_P262826	45151
Cell wall structure and function
TA56367_4565	0.540662	1	1	1	Exoglucanase precursor	ta|TA56367_4565|ta|TA56393_4565|ta|CK196810|tc|TC437554	A_99_P215601	6504
TA56367_4565	0.473802	1	1	1	Beta-D-glucan exohydrolase isoenzyme ExoI	ta|TA56367_4565|ta|CK196810|ta|CD877773|tc|TC391257	A_99_P433432	15270
TA66611_4565	8.68598	1	0.337209	1	Fasciclin-like protein FLA15	ta|TA66611_4565|ta|CA732456|tc|TC410644|tc|TC446041	A_99_P248201	22500
TA68562_4565	1	1	0.376623	1	Glycoside hydrolase, family 19	ta|TA68562_4565|ta|TA68566_4565|ta|TA68567_4565|tc|TC437984	A_99_P255031	1863
CK205454	1	1	0.369907	1	Non-specific lipid transfer protein 1 precursor	ta|CK205454|tc|TC386576	A_99_P427502	36085
TA61828_4565	1	1	0.366803	1	Non-specific lipid-transfer protein	ta|TA61828_4565|tc|TC390968|tc|TC385911	A_99_P231006	27677
CK152333	1	1	0.320218	1	Type 1 non specific lipid transfer protein precursor	ta|CK152333|tc|TC400994	A_99_P446157	36915
TA87087_4565	1	1	0.0592428	1	Cinnamyl alcohol dehydrogenase	ta|TA87087_4565|tc|TC406587	A_99_P318481	8569
AB114627	1	1	1	0.311647	Taxi-III mRNA for xylanase inhibitor TAXI-III	gb|AB114627|gb|AK335043|gb|AB114626|ta|TA52330_4565	A_99_P195998	22657
Pigment biosynthesis
TA56529_4565	2.1599	1	1	1	Glutamyl-tRNA reductase 2	ta|TA56529_4565|ta|CD923314|tc|TC441372	A_99_P216016	43656
TA92426_4565	4.55339	1	1	1	Beta-carotene hydroxylase	ta|TA92426_4565|tc|TC401433	A_99_P336181	23802
Chloroplast structure and function
TA92734_4565	1	1	0.314964	1	Diap1 protein	ta|TA92734_4565|tc|TC422388	A_99_P337136	42984
TA69442_4565	1	1	1	0.29428	Plastid-specific 30S ribosomal protein 1, chloroplast precursor	ta|TA69442_4565|ta|TA69443_4565|ta|CK212082|tc|TC451922	A_99_P258121	37451
Light harvesting and photosynthesis
TA56048_4565	2.33696	1	1	1	Ribulose bisphosphate carboxylase small chain	ta|TA56048_4565|ta|BJ233618|ta|CA676813|tc|TC399401	A_99_P444042	23343
TC371150	4.00988	1	1	0.180512	Chlorophyll a/b-binding protein WCAB precursor	tc|TC371150	A_99_P409112	19146
CK217674	3.30757	1	1	0.321569	Chloroplast pigment-binding protein CP24	ta|CK217674|tc|TC394184	A_99_P437157	39278
TA55816_4565	1	1	1	0.505021	Light-harvesting complex I	ta|TA55816_4565|ta|CJ731763|tc|TC435331	A_99_P214401	27084
TA53867_4565	1	1	1	0.351202	Light-induced protein 1-like	ta|TA53867_4565|ta|CD861644|ta|CV774504|tc|TC446281	A_99_P209081	23883
TA59583_4565	1	1	1	0.359015	Light-regulated protein precursor	ta|TA59583_4565|tc|TC414713	A_99_P223636	16866
Carbohydrate metabolism
TA72052_4565	0.418681	1	1	1	Beta-amylase	ta|TA72052_4565|tc|TC398242	A_99_P009886	12260
Amino-acids metabolism
TA64535_4565	1	1	0.340233	1	Glycine decarboxylase P subunit	ta|TA64535_4565|ta|TA64537_4565|tc|TC374621|tc|TC375538	A_99_P240211	15342
TC430171	1	1	0.0892626	1	Indole-3-glycerol phosphate lyase	tc|TC430171	A_99_P496502	8009
TA69140_4565	1	1	0.306084	1	L-allo-threonine aldolase-related protein	ta|TA69140_4565|ta|TA69141_4565|tc|TC403445|tc|TC382170	A_99_P449637	41850
TA69994_4565	1	1	0.376433	1	Glutamate dehydrogenase	ta|TA69994_4565|ta|CJ567636|tc|TC387564	A_99_P259951	10977
TC393988	1	1	0.130762	1	Glycine/proline-rich protein	tc|TC393988	A_99_P543657	7174
TA60889_4565	1	1	1	2.85542	S-adenosylmethionine synthetase	ta|TA60889_4565|ta|TA60901_4565|ta|CK216305|tc|TC374119	A_99_P227511	9678
Protein metabolism
TA59594_4565	3.25593	1	1	1	22.3kDa heat-shock protein	ta|TA59594_4565|tc|TC407342	A_99_P223676	44575
TA64099_4565	2.60162	1	0.151869	3.40965	Heat shock protein 80	ta|TA64099_4565|ta|TA64100_4565|tc|TC394212	A_99_P238761	26
HM209063	1	1	0.235367	2.19968	Heat shock protein 70-like (HSP70)	gb|HM209063|gb|HP619938|gb|L41505|ta|TA62928_4565	A_99_P234541	16785
TC414782	1	1	0.263852	1	Asparaginase	tc|TC414782	A_99_P466942	23822
TA53535_4565	1	1	0.192349	1	Ubiquitin carrier protein	ta|TA53535_4565|ta|TA53345_4565|ta|CD884325|tc|TC377198	A_99_P208256	24763
TA78844_4565	1	1	1	0.460639	Papain-like cysteine peptidase XBCP3	ta|TA78844_4565|tc|TC377178	A_99_P290171	29285
Signaling, transcription, translation
TA82476_4565	3.73527	1	1	1	HAP3-like transcriptional-activator	ta|TA82476_4565|ta|BJ208952|ta|BT009265|tc|TC448500	A_99_P302726	42546
TA52984_4565	3.62711	1	1	1	Histone H1 WH1B.1	ta|TA52984_4565|ta|CK205883|tc|TC430468|tc|TC412053	A_99_P497187	27663
TC447945	0.422012	1	1	1	Myb-related protein MYBAS1	tc|TC447945	A_99_P538902	19305
TC450123	1	0.0664429	1	1	rDNA tandem repeat with genes for 18S, 5.8S and 26S rRNA	tc|TC450123	A_99_P544312	866
CA721206	1	1	0.3296	1	Zinc finger protein 219	ta|CA721206|tc|TC446120	A_99_P533942	44850
D16416	1	1	1	0.507171	Zinc-finger protein WZF1	gb|D16416|ta|TA77580_4565|tc|TC426981|tc|TC371841	A_99_P489622	10858
